# Supplementary material for: Structural insights into intron catalysis and dynamics during splicing
Source: Springer Nature journal article supplement (doi:10.1038/s41586-023-06746-6), 2023-11-22
Supplement: MOESM1 [file 41586_2023_6746_MOESM1_ESM.pdf]

---

**Supplementary information**

---

**Structural insights into intron catalysis and dynamics during splicing**

---

In the format provided by the  
authors and unedited

Supplementary Information Figure S1

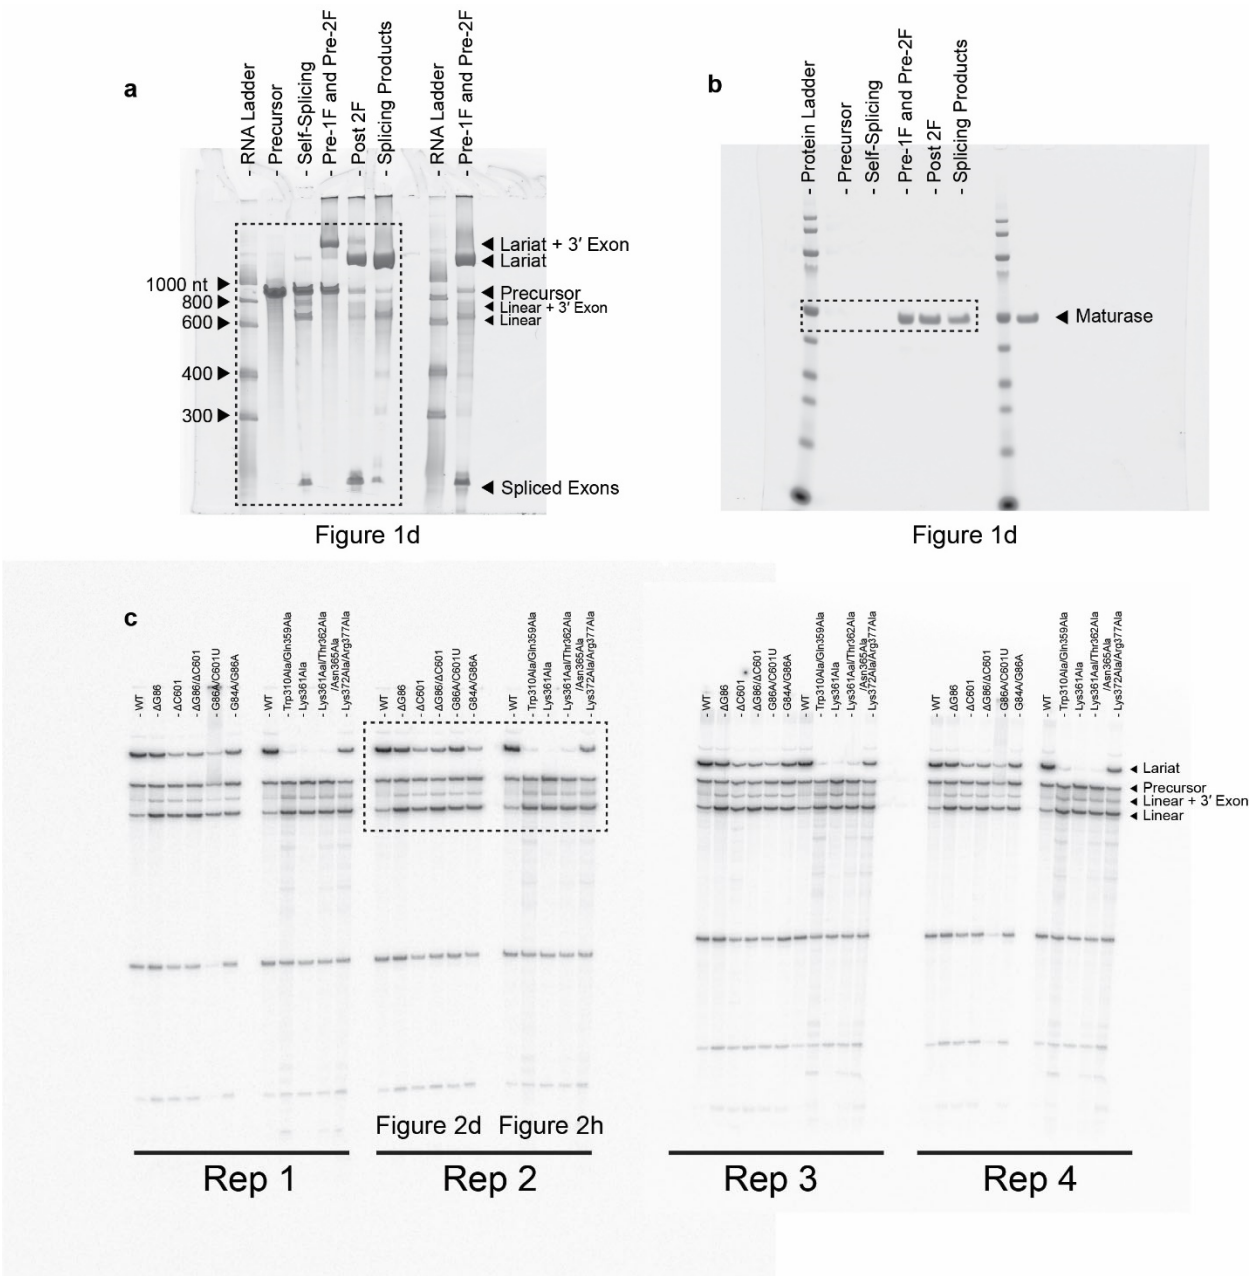

## Supplementary Information Figure S2

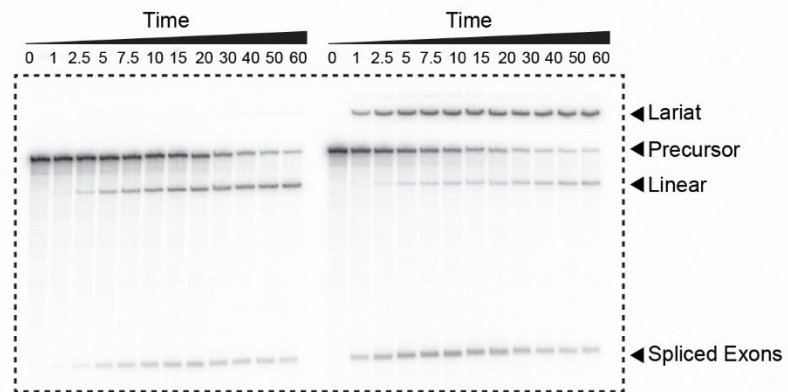

Extended Data Fig. 1a,c
